# Supplementary material
Source: Springer Nature journal article supplement (https://www.springermedizin.de/resource/supplementary/12885_2006_613_MOESM5_ESM.pdf/9469896)
Supplement: MOESM5 [file 9469896]

**a) Chinese**

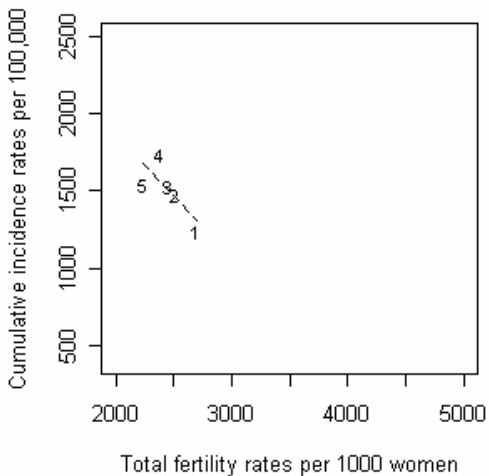

**b) Malay**

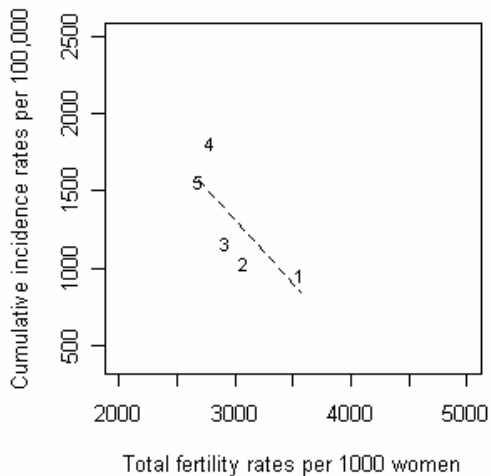

**c) Indian**

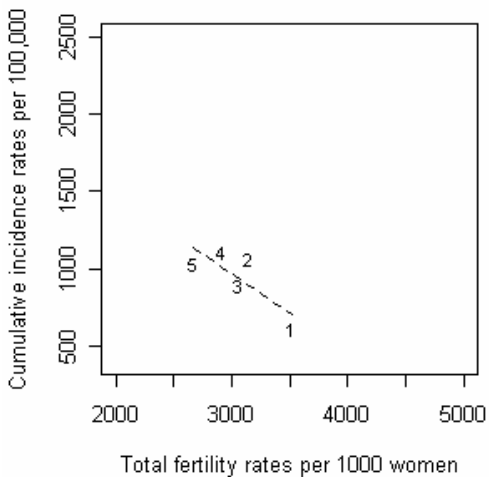

- 1 1943-1944
- 2 1945-1946
- 3 1947-1948
- 4 1949-1950
- 5 1951-1952

Note:

1. total fertility computed for women aged 15 to 44
2. cumulative incidences computed for women aged 25-49
3. regression lines are marked by --- line across the points
